# Supplementary material for: Coagulation abnormalities in children with uncorrected congenital heart defects seen at a teaching hospital in a developing country
Source: PLoS One. 2022 Jul 28;17(7):e0263948. doi: 10.1371/journal.pone.0263948 (PMC9333323; doi:10.1371/journal.pone.0263948)
Supplement: S2 Appendix — (XLS) [file pone.0263948.s002.xls]

## Sheet: CASES
ID	AGE	SEX	WEIGHT(kg)	HEIGHT	Wgt for age	intepretation		Hgt for age	intepretation		BMI for age	intepretation		Socioeconomic class	family hx of bleeding	Oxygen saturation (%)	cardiac defect	type of CHD	heart failure class	Haemoglobin(g/dl)	Intepretation	Haematocrit(%)	Plt count(cells/mm3)	intepretation	Prothrombin time(secs)	intepretation	International normalized ratio (INR)	Explanation	aPTT(secs)	intepretation	D-dimer (pg/ml)	d-dimer intepretation		Coagulation profile
A01	11years	M	30	144				-0.65	normal		-1.96	normal		Low	NO	95	ACHD	VSD	I	9.5	mild anaemia	28.5	281000	normal	14.4	normal	1.07	normal	45.8	normal	3.324	elevated		abnornal
A02	14 months	F	7.3	72	-3.07	severely underweight		-2.45	moderately stunted		-2.31	moderately wasted		Middle	NO	89	ACHD	ASD	NO	8.3	mild anaemia	25	402000	normal	11.1	normal	0.82	normal	30.8	normal	0.563	normal		Normal
A03	17 months	M	8	75	-2.72	moderately underweight		-2.26	moderately stunted		-1.95	normal		Middle	NO	92	ACHD	PDA	I	10.8	normal	33.4	359000	normal	15	normal	1.1	normal	37.2	normal	1.024	normal		Normal
A04	9 months	M	7.5	70	-1.87	normal		-0.41	normal		-2.33	moderately wasted		High	NO	80	ACHD	AVCD	II	9.1	mild anaemia	27.7	551000	normal	13.3	normal	0.99	normal	59.6	prolonged	3.355	elevated		abnornal
A05	3 years	F	16	105	0.21	normal		0.96	normal		-0.58	normal		High	NO	98	ACHD	VSD+ASD	II	9.7	normal	29.1	276000	normal	11.1	normal	0.82	normal	47.4	normal	1.227	normal		Normal
A06	3 years	M	10	90	-3.02	severely underweight		-1.66	normal		-3.05	severely wasted		Low	NO	97	ACHD	Bicuspid aortic valve	NO	9.5	normal	29	557000	normal	14	normal	1.04	normal	37.5	normal	3.305	elevated		abnornal
A07	3 years	M	10	85	-3.2	severely underweight		-3.3	severely stunted		-1.47	normal		High	NO	74	CCHD	Truncus arteriosus	NO	10.2	normal	30.6	326000	normal	13.5	normal	1	normal	29.7	normal	0.615	normal		Normal
A08	5 years	F	12	99.5	-3.35	severely underweight		-2.32	moderately stunted		-2.61	moderately wasted		Middle	NO	89	ACHD	VSD	I	11.7	normal	35.1	103000	normal	13.6	normal	1	normal	51.7	normal	1.075	normal		Normal
A09	2 years	M	12	98	-0.6	normal		2.39	normal		-3.24	severely wasted		Low	NO	67	CCHD	TOF	NO	15.2	polycythemia	45.6	194000	normal	10.8	normal	0.8	normal	34.9	normal	2.879	normal		Normal
A10	3 years	M	9	90	-4.09	severely underweight		-2.26	moderately stunted		-4.2	severely wasted		High	NO	87	CCHD	TOF	NO	13.7	normal	41.1	421000	normal	11.7	normal	0.87	normal	45.2	normal	0.685	normal		Normal
A11	17 months	F	7	75	-3.19	severely underweight		-1.66	normal		-3.12	severely wasted		Middle	NO	68	CCHD	PA	NO	20.5	polycythemia	62	172000	normal	12.1	normal	0.9	normal	38.4	normal	1.499	normal		Normal
A12	3 years	M	13.6	96	-0.57	normal		-0.27	normal		-0.67	normal		Middle	NO	87	CCHD	TOF	NO	20.6	polycythemia	62	163000	normal	20	prolonged	1.48	prolonged	71.9	prolonged	0.648	normal		abnornal
A13	11 months	M	8.4	72	-1.3	normal		-1.36	normal		-0.69	normal		High	NO	74	CCHD	PA	NO	15.1	polycythemia	45.3	163000	normal	22.4	prolonged	1.66	prolonged	56.3	prolonged	1.387	normal		abnornal
A14	9 years	M	18	115	-3.34	severely underweight		-2.93	moderately stunted		-1.89	normal		Middle	NO	93	ACHD	VSD+ASD	I	10.5	normal	32	208000	normal	19.2	prolonged	1.42	prolonged	43.5	normal	0.809	normal		abnornal
A15	8 months	F	6.3	72.5	-2.02	moderately underweight		1.41	normal		-3.86	severely wasted		Middle	NO	63	CCHD	TOF	NO	13	normal	39	90000	thrombocytopenia	18.6	prolonged	1.38	prolonged	38.2	normal	1.567	normal		abnornal
A16	5 years	M	15	105	-1.9	normal		-1.51	normal		-1.42	normal		High	NO	80	CCHD	TOF	NO	14.6	normal	43.8	235000	normal	18	prolonged	1.33	prolonged	39.3	normal	0.818	normal		abnornal
A17	6 years	F	16	115	-2.31	moderately underweight		-0.99	normal		-2.62	moderately wasted		High	NO	60	CCHD	TOF	NO	12	normal	36	99000	thrombocytopenia	13.9	normal	1.03	normal	34.5	normal	0.73	normal		abnornal
A18	2 years	F	12	98	-1.07	normal		0.89	normal		-2.61	moderately wasted		High	NO	96	ACHD	VSD+ASD	I	10.5	normal	31.5	322000	normal	16.6	normal	1.23	normal	40.8	normal	0.747	normal		Normal
A19	19 months	F	10	77	-0.49	normal		-1.61	normal		0.69	normal		Middle	NO	97	ACHD	VSD	I	9.7	normal	29.1	307000	normal	12.1	normal	0.9	normal	39.2	normal	1.147	normal		Normal
A20	6 months	F	6.5	75	-1.33	normal		3.66	normal		-4.41	severely wasted		Middle	NO	95	CCHD	Corrected TGA	NO	9	normal	28.1	342000	normal	15.9	normal	1.18	normal	63.6	prolonged	0.908	normal		abnornal
A21	14 months	F	8	71	-1.41	normal		-1.91	normal		-0.37	normal		High	NO	99	ACHD	VSD	I	7.9	mild anaemia	25.6	290000	normal	11.3	normal	0.84	normal	48.3	normal	1.147	normal		Normal
A22	4 years	M	15	105	-1.41	normal		-0.9	normal		-1.33	normal		Middle	NO	74	CCHD	TOF	NO	20.8	polycythemia	62.5	166000	normal	15.9	normal	1.18	normal	41.1	normal	0.69	normal		Normal
A23	7 years	F	17	123	-1.97	normal		0.3	normal		-3.53	severely wasted		High	NO	78	CCHD	TOF	NO	13.7	normal	41.3	312000	normal	14	normal	1.04	normal	50.9	normal	3.68	elevated		abnornal
A24	5 years	M	16	113.8	-1.7	normal		-0.12	normal		-2.73	moderately wasted		Middle	NO	96	ACHD	ASD	NO	11	normal	33.3	499000	normal	14.6	normal	1.08	normal	42.8	normal	0.684	normal		Normal
A25	7 years	M	24	124	-0.35	normal		-0.5	normal		-0.07	normal		High	NO	99	ACHD	PDA	I	11.9	normal	35.7	114000	normal	12.2	normal	0.9	normal	42.1	normal	2.656	normal		Normal
A26	4 years7mth	F	14	97.5	-1.54	normal		-2.02	moderately stunted		-0.37	normal		High	NO	98	ACHD	VSD	NO	7.2	mild anaemia	22	132000	normal	11.4	normal	0.84	normal	55.2	normal	2.215	normal		Normal
A27	8 years	F	15	110	-4	severely underweight		-3.42	severely stunted		-2.61	moderately wasted		Middle	NO	97	ACHD	Severe PS+ASD	NO	9.7	normal	29.1	107000	normal	13.6	normal	1	normal	41.4	normal	1.825	normal		Normal
A28	10 years	F	25	138.5	-0.64	normal		-0.44	normal		-2.52	moderately wasted		Low	NO	74	CCHD	TOF	NO	20.7	polycythemia	62.1	168000	normal	14.1	normal	1.04	normal	48.7	normal	0.641	normal		Normal
A29	3 years	F	11	90	-1.96	normal		-1.5	normal		-1.5	normal		High	NO	97	ACHD	ASD	NO	10.6	normal	31.8	590000	normal	12.7	normal	0.94	normal	33.6	normal	1.455	normal		Normal
A30	5 years	M	14	105	-2.61	moderately underweight		-1.7	normal		-2.34	moderately wasted		Middle	NO	88	ACHD	VSD+PS	I	10.4	normal	31.5	271000	normal	20.2	prolonged	1.5	prolonged	43.7	normal	0.912	normal		abnornal
A31	20months	F	7.75	80	-2.84	moderately underweight		-0.93	normal		-3.31	severely wasted		Middle	NO	97	ACHD	VSD+PDA	I	12.6	normal	38	413000	normal	17.2	normal	1.27	normal	37	normal	0.704	normal		Normal
A32	13 months	F	8.1	75.2	-1.07	normal		0.15	normal		-1.66	normal		High	NO	95	ACHD	AVCD	I	12.7	normal	38.1	969000	normal	14.8	normal	1.1	normal	54.7	normal	0.818	normal		Normal
A33	23 month	M	10	81	-1.59	normal		-1.78	normal		-0.68	normal		Middle	NO	83	CCHD	Truncus arteriosus	I	20.9	polycythemia	62.8	166000	normal	22.5	prolonged	1.67	prolonged	53.1	normal	1.472	normal		abnormal
A34	9 years	F	25	130	-1.33	normal		-1.13	normal		-0.96	normal		Middle	NO	80	CCHD	Pentalogy of Fallot	NO	16.6	polycythemia	50	464000	normal	13.4	normal	1	normal	37.7	normal	3.111	normal		Normal
A35	5 years	F	14	101.5	-2.39	moderately underweight		-2.27	moderately stunted		-1.22	normal		Middle	NO	85	CCHD	Tricuspid atresia+VSD	NO	15.4	normal	46.7	129000	normal	11	normal	0.81	normal	20.3	normal	3.35	elevated		abnormal
A36	21months	F	9	74.4	-1.67	normal		-2.97	moderately stunted		0.34	normal		High	NO	87	CCHD	TOF	NO	11.6	normal	34.8	296000	normal	14.6	normal	1.08	normal	37.9	normal	0.661	normal		Normal
A37	7 months	F	4.5	61	-4.51	severely underweight		-3.22	severely stunted		-3.77	severely wasted		Middle	NO	98	ACHD	PDA	II	10.6	normal	33.1	278000	normal	10.1	normal	0.75	normal	50.3	normal	1.869	normal		Normal
A38	9 years	F	20	128	-2.1	moderately underweight		-2.35	moderately stunted		-3.12	severely wasted		High	NO	95	ACHD	VSD	I	11.8	normal	37.1	403000	normal	12.1	normal	0.9	normal	56.9	normal	3.085	normal		Normal
A39	3 years	M	9	78.5	-3.96	severely underweight		-5	severely stunted		-0.78	normal		Low	NO	72	CCHD	DORV+VSD	NO	15	polycythemia	45	158000	normal	13.5	normal	1	normal	28.9	normal	1.043	normal		Normal
A40	2 years 9mth	F	12.65	90	-0.43	normal		-0.86	normal		0.13	normal		Low	NO	65	CCHD	TOF	NO	9.1	normal	27.3	99000	thrombocytopenia	13.9	normal	1.03	normal	34.5	normal	1.449	normal		abnormal
A41	3 years	M	14	96	-0.27	normal		-0.15	normal		-0.32	normal		High	NO	92	CCHD	Truncus arteriosus	I	10.2	normal	30.8	326000	normal	15	normal	1.11	normal	45	normal	1.295	normal		Normal
A42	22 months	M	10	74	-1.34	normal		-3.74	severely stunted		1.49	normal		High	NO	81	CCHD	HLHS	NO	18.3	polycythemia	55	61000	thrombocytopenia	15.4	normal	1.14	normal	42.3	normal	1.5	normal		abnornal
A43	21months	M	6.15	70.3	-5.19	severely underweight		-5.06	severely stunted		-3.59	severely wasted		Middle	NO	72	CCHD	Tricuspid atresia+PA	I	20.7	polycythemia	62.1	198000	normal	16.4	normal	1.3	normal	68.3	prolonged	1.137	normal		abnornal
A44	4 years	F	12	93	-2.94	moderately underweight		-3.32	severely stunted		-1.01	normal		Middle	NO	91	ACHD	ASD	I	13.2	normal	41.2	172000	normal	10.6	normal	0.87	normal	32.1	normal	0.885	normal		Normal
A45	5 years	F	16	105	0.5	normal		1.48	normal		-0.62	normal		High	NO	88	ACHD	ASD	I	13.5	normal	41.9	260000	normal	13.5	normal	1.11	normal	32	normal	0.825	normal		Normal
A46	2 years 6mth	M	7.8	76	-4.34	severely underweight		-4.66	severely stunted		-2.07	moderately wasted		Middle	NO	89	CCHD	Double inlet left ventricle	NO	11.9	normal	36	165000	normal	19.4	prolonged	1.6	prolonged	63.7	prolonged	0.596	normal		abnornal
A47	13 months	M	8	77.5	-2.07	moderately underweight		0.15	normal		-3.13	severely wasted		Middle	NO	97	ACHD	VSD	I	11.7	normal	35.4	244000	normal	12.7	normal	1.04	normal	45.4	normal	0.565	normal		Normal
A48	8 years	F	20	117	-1.5	normal		-1.67	normal		-0.66	normal		Low	NO	98	ACHD	VSD	I	12.1	normal	36.5	400000	normal	11.7	normal	0.96	normal	46.2	normal	1.041	normal		Normal
A49	15 years	M	57.5	167		normal		-0.75	normal		0.05	normal		Middle	NO	60	CCHD	TOF+PA	NO	23.4	polycythemia	70.2	138000	normal	20	prolonged	1.64	prolonged	70	prolonged	0.632	normal		abnornal
A50	2 years	M	10	79.5	-1.75	normal		-2.57	moderately stunted		-0.15	normal		Middle	NO	77	ACHD	AVCD	I	15.3	normal	45.9	181000	normal	13.7	normal	1.12	normal	45.6	normal	0.742	normal		Normal
A51	10 years	M	30	142	-0.24	normal		0.64	normal		-1.04	normal		Middle	NO	97	ACHD	VSD	I	10.7	normal	32.5	368000	normal	12	normal	0.98	normal	42.3	normal	1.924	normal		Normal
A52	16 years	M	30	144				-3.63	severely stunted		-3.41	severely wasted		Low	NO	98	ACHD	VSD	III	11.3	normal	34	294000	normal	13.8	normal	1.13	normal	48.5	normal	1.192	normal		Normal
A53	12 years	F	42	150				-0.75	normal		0.03	normal		High	NO	72	CCHD	DORV+VSD	NO	19.9	polycythemia	59.7	51000	thrombocytopenia	16.5	prolonged	1.35	prolonged	53.5	prolonged	0.917	normal		abnornal
A54	8 years	F	17	115	-3.36	severely underweight		-2.77	moderately stunted		-2.23	moderately wasted		Middle	NO	61	CCHD	TOF	NO	22.6	polycythemia	67.8	174000	normal	15.4	normal	1.26	normal	36.8	normal	1.9	normal		Normal
A55	9 months	F	5.6	65	-3.27	severely underweight		-2.22	moderately stunted		-2.7	moderately wasted		Middle	NO	97	ACHD	VSD	II	12.1	normal	36.3	500000	normal	14.2	normal	1.16	normal	47.8	normal	1.914	normal		Normal
A56	15 years	M	27	125				-5.97	severely stunted		-1.41	normal		Middle	NO	72	CCHD	TGA+VSD	NO	22	polycythemia	66	71000	thrombocytopenia	19.2	prolonged	1.57	prolonged	57	prolonged	0.898	normal		abnornal
A57	14 months	M	7	70	-3.44	severely underweight		-3.31	severely stunted		-2.11	moderately wasted		High	NO	88	CCHD	TOF	NO	15.1	normal	45.3	275000	normal	12.5	normal	1.02	normal	51.4	normal	0.779	normal		Normal
A58	2years 6months	F	9.4	77.5	-3	severely underweight		-4.28	severely stunted		-0.11	normal		Middle	NO	80	CCHD	TOF	NO	21.5	polycythemia	64.5	32000	thrombocytopenia	14.4	normal	1.18	normal	35.5	normal	1.028	normal		abnornal
A59	6 years	M	15	113	-2.68	moderately underweight		-0.88	normal		-3.46	severely wasted		Middle	NO	80	CCHD	TOF	NO	20.4	polycythemia	61.2	221000	normal	32.1	prolonged	2.63	prolonged	64.2	prolonged	3.287	elevated		abnornal
A60	14 months	F	7.5	73	-2.06	moderately underweight		-1.38	normal		-1.75	normal		Low	NO	73	CCHD	TOF	NO	19.5	polycythemia	58.5	299000	normal	16.7	prolonged	1.36	prolonged	41.7	normal	0.802	normal		abnornal
A61	8 years	F	10	106	-6.09	severely underweight		-4.29	severely stunted		-6.06	severely wasted		Middle	NO	75	CCHD	Truncus arteriosus	NO	18	polycythemia	54	165000	normal	14	normal	1.2	normal	40	normal	1.5	normal		Normal
A62	7 months	F	6.4	66.5	-1.77	normal		-0.59	normal		-1.97	normal		High	NO	99	ACHD	VSD	I	12.2	normal	36.8	226000	normal	14.9	normal	1.15	normal	56.2	prolonged	0.192	normal		abnornal
A63	11years	M	30	140				-0.75	normal		-1.02	normal		Low	NO	99	ACHD	AVCD	I	13.2	normal	40	299000	normal	13.3	normal	1.02	normal	40	normal	0.813	normal		Normal
A64	17 years	F	43	157				-0.9	normal		-1.48	normal		Low	NO	90	CCHD	Ebstein anomaly	III	17	normal	51	272000	normal	16.4	normal	1.26	normal	36.3	normal	0.75	normal		Normal
A65	7 months	F	5.5	68	-2.73	moderately underweight		0.33	normal		-3.94	severely wasted		Middle	NO	70	CCHD	TOF+PA	NO	19.4	polycythemia	58.2	36000	thrombocytopenia	14	normal	1.08	normal	39	normal	0.878	normal		abnornal
A66	4 years	F	15	102	-1.13	normal		-1.08	normal		-0.67	normal		Middle	NO	98	ACHD	VSD	I	10	normal	30	217000	normal	16.1	normal	1.24	normal	55.1	normal	0.844	normal		Normal
A67	2 years 11mth	F	13.6	96	-0.57	normal		-0.27	normal		-0.67	normal		Middle	NO	99	ACHD	ASD	NO	14.5	normal	43.5	247000	normal	11.6	normal	0.89	normal	28.6	normal	0.935	normal		Normal
A68	8 years	F	18.5	113	-2.04	moderately underweight		-2.34	moderately stunted		-0.74	normal		Middle	NO	99	ACHD	VSD	I	9	normal	28	166000	normal	10.8	normal	0.83	normal	34.9	normal	1.036	normal		Normal
A69	9 years	F	27	139	-1	normal		-1.3	normal		1	normal		High	NO	97	ACHD	Coarctation of aorta+PDA	I	8.8	normal	27	539000	normal	14.8	normal	1.14	normal	38.5	normal	0.681	normal		Normal
A70	18 months	F	10	75	-1.3	normal		-0.5	normal		-0.6	normal		High	NO	93	CCHD	TOF	NO	15	normal	45	158000	normal	13.7	normal	1.05	normal	28.4	normal	0.863	normal		Normal

## Sheet: CONTROLS
ID	AGE	SEX	WEIGHT	HEIGHT	Wgt for age	intepretation	Hgt for age	intepretation	BMI for age	intepretation	Socioeconomic class	Family history of bleeding	oxygen sat (%)	Packed cell volume	Haemoglobin	intepretation	plt count		Prothrombin time(secs)		Intepretation	INR	Intepretation	aPTT(secs)		intepretation	D-dimer	D-dimer intepretation
B01	8 years	M	27	130	0.4	normal	0.47	normal	0.15	normal	High	YES	95	30.9	9.9	normal	385000	normal	14.1		normal	1	normal	50		normal	1.592	normal
B02	6 years	F	20	119	-0.09	normal	0.7	normal	-0.8	normal	Middle	NO	99	32.7	10.6	normal	428000	normal	13.5		normal	1	normal	34.8		normal	1.681	normal
B03	5 years	M	20	120	-0.23	normal	0.56	normal	-0.97	normal	Middle	NO	99	27.7	8.7	mild anaemia	569000	normal	12.9		normal	0.96	normal	51		normal	2.839	normal
B04	10 months	F	6.5	71	-2.28	moderately underweight	-0.03	normal	-2.39	moderately wasted	High	NO	98	33.5	11.6	normal	468000	normal	16.6		normal	1.2	normal	39		normal	2.864	normal
B05	4 years	F	15	103	-0.8	normal	-0.44	normal	-0.82	normal	High	NO	98	29.9	9.8	normal	462000	normal	13.9		normal	1.03	normal	34.1		normal	0.632	normal
B06	4 years	F	15	102	-0.8	normal	-0.66	normal	-0.61	normal	High	NO	98	34.8	11.8	normal	400000	normal	13.4		normal	0.99	normal	43.4		normal	2.028	normal
B07	20months	M	10	78.4	-1.44	normal	-2.39	moderately stunted	0.12	normal	Middle	NO	98	31.6	10.7	normal	453000	normal	9.8		normal	0.73	normal	32.8		normal	1.204	normal
B08	7 years	F	24	123	-0.24	normal	-0.59	normal	0.11	normal	Middle	NO	99	30.8	10	normal	517000	normal	13.8		normal	1.02	normal	44.7		normal	2.404	normal
B09	5 years	M	30	124	3.58	overweight	2.94	tall	2.67	overweight	Low	NO	99	36.2	12.2	normal	473000	normal	12.9		normal	0.96	normal	39.1		normal	1.122	normal
B10	3 years	F	15	102	1.09	normal	0.24	normal	0.13	normal	Low	NO	99	33.7	11.2	normal	162000	normal	14		normal	1.04	normal	27.1		normal	2.954	normal
B11	4 years	F	19	114	0.48	normal	1.32	normal	-0.45	normal	High	NO	99	29.4	9.3	normal	464000	normal	12		normal	0.89	normal	29.4		normal	0.92	normal
B12	3 years	M	15	103	-0.53	normal	0.18	normal	-1.03	normal	Middle	NO	99	29.6	9.4	normal	372000	normal	13		normal	0.96	normal	38.5		normal	3.111	raised
B13	8 months	F	7.5	76	-0.67	normal	2.63	tall	-2.97	moderately wasted	Middle	NO	99	35.3	11.5	normal	312000	normal	11.9		normal	0.88	normal	48.4		normal	0.78	normal
B14	2 years	F	11	87	-0.56	normal	0	normal	-0.89	normal	High	NO	99	35.2	10.6	normal	458000	normal	14.9		normal	1.1	normal	36.7		normal	2.805	normal
B15	8 months	F	7	70.5	-1.25	normal	0.34	normal	-2.01	moderately wasted	Middle	NO	96	34.5	11.5	normal	418000	normal	13.6		normal	1.01	normal	55.7		normal	0.695	normal
B16	9 years	M	36	135	1.37	normal	0.22	normal	1.7	normal	High	NO	97	30	9.2	normal	578000	normal	12.2		normal	0.9	normal	41.5		normal	0.821	normal
B17	2 years	F	14	90.4	1.09	normal	1.97	normal	1.16	normal	High	NO	99	34.5	11.6	normal	202000	normal	14		normal	1.04	normal	45.3		normal	1.632	normal
B18	3 years	M	15	93	-0.14	normal	-1.66	normal	1.41	normal	High	NO	98	30.1	9.7	normal	552000	normal	13		normal	0.96	normal	47.9		normal	0.711	normal
B19	22 months	F	10	83	-0.89	normal	-0.4	normal	-0.96	normal	Middle	NO	96	30.2	10	normal	423000	normal	13.5		normal	1	normal	49.4		normal	0.603	normal
B20	6 years	F	30	132.5	2.19	overweight	2.95	tall	1	normal	High	NO	99	30.2	9.8	normal	440000	normal	14.4		normal	1.07	normal	43.6		normal	1.193	normal
B21	4 years	F	15	105	-0.81	normal	-0.01	normal	-1.25	normal	High	NO	98	35.6	12.2	normal	95000	Thrombocytopenia	14.6		normal	1.08	normal	41.4		normal	1.756	normal
B22	4 years	F	17	103	-0.44	normal	-1.3	normal	0.49	normal	Middle	NO	98	31.4	10.7	normal	396000	normal	10.4		normal	0.77	normal	47.4		normal	2.66	normal
B23	5 years	M	21	104	0.52	normal	-1.99	normal	2.53	overweight	High	NO	98	31.1	10.4	normal	428000	normal	10.4		normal	0.77	normal	40.4		normal	2.746	normal
B24	8 years	F	19	115.5	-1.97	normal	-2.06	moderately stunted	-0.94	normal	High	NO	99	25.9	8.5	mild anaemia	679000	normal	13.6		normal	1.01	normal	53.1		normal	2.374	normal
B25	19 month	M	10.1	75	-1.01	normal	-2.98	moderately stunted	1.21	normal	Middle	NO	100	31.2	10.5	normal	205000	normal	15.9		normal	1.18	normal	43.2		normal	2.492	normal
B26	2 years	M	12	89.5	-1.32	normal	-1.5	normal	-0.56	normal	Middle	NO	98	32.7	11.2	normal	344000	normal	13.8		normal	1.02	normal	54.2		normal	2.345	normal
B27	21 months	F	15	80	2.48	overweight	-1.02	normal	4.33	overweight	High	NO	99	26	8.3	mild anaemia	354000	normal	15.1		normal	1.12	normal	49.2		normal	1.869	normal
B28	20months	M	10.3	80	-0.93	normal	-1.39	normal	-0.1	normal	Middle	NO	98	35.2	11.4	normal	97000	Thrombocytopenia	13.2		normal	0.98	normal	48.6		normal	1.825	normal
B29	17 months	M	15	85	2.96	overweight	1.51	normal	2.77	overweight	Middle	NO	98	31.6	10.4	normal	360000	normal	13.3		normal	0.99	normal	34.6		normal	2.304	normal
B30	13 months	F	8	79	-1.27	normal	1.37	normal	-2.99	moderately wasted	Middle	NO	99	29.9	9.8	normal	588000	normal	13.7		normal	1.01	normal	37.3		normal	1.486	normal
B31	11 months	F	9	76	-0.15	normal	0.56	normal	-0.68	normal	High	NO	99	31.2	10.5	normal	395000	normal	16.5		normal	1.22	normal	41.1		normal	1.241	normal
B32	4 years	M	18	119.5	0.62	normal	3.59	tall	-2.44	moderately wasted	Middle	NO	99	28.7	9.5	mild anaemia	421000	normal	17.7		prolonged	1.31	prolonged	30.9		normal	0.793	normal
B33	6 years	F	21	114	0.03	normal	-0.6	normal	0.51	normal	High	NO	99	45.2	15.2	normal	197000	normal	11.7		normal	0.87	normal	41		normal	0.947	normal
B34	11 months	F	8	73	-0.92	normal	-0.12	normal	-1.22	normal	Middle	NO	98	29	9.7	mild anaemia	458000	normal	14.4		normal	1.07	normal	50		normal	0.461	normal
B35	15 months	M	11.5	83	0.83	normal	1.41	normal	0.05	normal	Middle	NO	99	33.1	11.6	normal	373000	normal	12.6		normal	0.93	normal	32.2		normal	2.097	normal
B36	16 months	M	10	73.2	-0.48	normal	-2.49	moderately stunted	1.41	normal	Low	NO	99	33.8	11.6	normal	323000	normal	14.5		normal	1.07	normal	49.2		normal	2.482	normal
B37	9 months	F	7	72	-1.4	normal	0.63	normal	-2.47	moderately wasted	Middle	NO	98	36.2	12.1	normal	308000	normal	16.8		normal	1.24	normal	37.6		normal	1.281	normal
B38	6 years	F	19	118.2	-0.41	normal	0.59	normal	-1.21	normal	High	NO	98	29.1	10.8	mild anaemia	358000	normal	11.6		normal	0.86	normal	33.6		normal	0.83	normal
B39	15 months	M	10.2	82	-0.1	normal	1.4	normal	-1.26	normal	High	NO	97	33.8	11.2	normal	229000	normal	10.5		normal	0.78	normal	43.1		normal	0.996	normal
B40	2 years	F	9	76	-2.76	moderately underweight	-2.5	moderately stunted	-0.33	normal	High	NO	98	38.9	13	normal	455000	normal	11		normal	0.81	normal	41.8		normal	3.266	raised
B41	2 years	M	9	76	-2.19	moderately underweight	-2.13	moderately stunted	-0.06	normal	High	NO	97	37.3	12.2	normal	312000	normal	12		normal	0.89	normal	33.2		normal	1.168	normal
B42	8 months	M	8.1	66	-0.74	normal	-2.42	moderately stunted	0.94	normal	High	NO	99	28.1	7.4	mild anaemia	138000	normal	12.9		normal	0.96	normal	52.4		normal	0.616	normal
B43	14 months	M	7	73	-3.33	severely underweight	-1.86	normal	-3.29	severely wasted	Low	NO	99	38.3	12.9	normal	309000	normal	10		normal	0.74	normal	34.8		normal	0.818	normal
B44	4 years	M	17	120	-0.75	normal	1.96	normal	-2.34	moderately wasted	Middle	NO	98	31.5	10.6	normal	197000	normal	12.3		normal	0.91	normal	29.4		normal	1.463	normal
B45	22 months	M	11	78	-0.78	normal	-2.83	moderately stunted	1.47	normal	Middle	NO	99	33.4	11	normal	424000	normal	11.6		normal	0.86	normal	32.8		normal	1.314	normal
B46	11 months	F	6.65	68	-2.31	moderately underweight	-1.69	normal	-1.81	normal	Middle	NO	98	37.8	12.1	normal	452000	normal	14.3		normal	1.06	normal	32.7		normal	1.082	normal
B47	23 months	F	10	83	-0.95	normal	-0.52	normal	-0.94	normal	High	NO	98	28	9.9	mild anaemia	202000	normal	11.1		normal	0.82	normal	41.2		normal	1.209	normal
B48	23 months	F	10	83	-0.94	normal	-0.49	normal	-0.95	normal	Middle	NO	99	33.5	10.7	normal	275000	normal	11.7		normal	0.87	normal	27.6		normal	1.054	normal
B49	2 years 9mth	F	13	95	-0.28	normal	0.37	normal	-0.83	normal	High	NO	99	32.3	10.5	normal	297000	normal	12.7		normal	0.94	normal	44.3		normal	1.31	normal
B50	11years	M	55	154.9			1.74	normal	2.11	overweight	High	NO	99	34.3	11.7	normal	484000	normal	13.7		normal	1.01	normal	35.4		normal	0.763	normal
B51	11years	F	35	140.6			-0.68	normal	0.2	normal	Middle	NO	99	34.5	11.4	normal	333000	normal	12.4		normal	0.92	normal	37.4		normal	0.948	normal
B52	16 years	M	72	173			-0.05	normal	1.11	normal	High	NO	99	34	11	normal	318000	normal	12.3		normal	0.91	normal	43.1		normal	1.35	normal
B53	12 years	F	50	156.6			0.63	normal	0.82	normal	Middle	NO	98	39.4	13.5	normal	414000	normal	14.3		normal	1.06	normal	41.6		normal	2.717	normal
B54	5 years	M	20	111.8	0.47	normal	0.13	normal	0.55	normal	High	NO	99	35.6	11.8	normal	462000	normal	12.2		normal	0.9	normal	32		normal	1	normal
B55	13 years	F	47	162			0.67	normal	-0.45	normal	High	NO	99	41.8	15.3	normal	256000	normal	11		normal	0.81	normal	34.5		normal	1.21	normal
B56	9 years	F	29	132	0	normal	-0.31	normal	0.22	normal	Middle	NO	98	31.8	12	normal	260000	normal	11		normal	0.81	normal	34.2		normal	1.5	normal
B57	2 yrs 3mth	F	11	75	-0.75	normal	-3.89	severely stunted	2.5	overweight	High	NO	98	29.5	11.5	normal	236000	normal	12.8		normal	0.95	normal	33.5		normal	0.888	normal
B58	8 years	M	31	139	1.15	normal	1.83	normal	0.15	normal	High	NO	98	36.7	13.6	normal	217000	normal	13.6		normal	1.01	normal	30.3		normal	0.757	normal
B59	6 years	F	20	120	-0.29	normal	0.55	normal	-0.99	normal	Middle	NO	98	37.3	12.6	normal	329000	normal	9.4		normal	0.7	normal	29.8		normal	2.407	normal
B60	8 years	F	49	140	2.94	overweight	1.44	normal	2.8	overweight	Middle	NO	99	38	12.8	normal	227000	normal	12.5		normal	0.93	normal	52.3		normal	2.554	normal
B61	11years	M	21	125			-2.85	moderately stunted	-2.66	moderately wasted	High	NO	99	34.1	11.1	normal	420000	normal	12.9		normal	0.96	normal	28.7		normal	0.615	normal
B62	4 years	M	15.5	112	-0.65	normal	1.62	normal	-2.67	moderately wasted	High	NO	97	35.1	11.1	normal	319000	normal	13.4		normal	0.99	normal	34.9		normal	2.039	normal
B63	11years	M	32	138			-1.56	normal	-0.38	normal	High	NO	98	37.3	12.6	normal	391000	normal	12.4		normal	0.92	normal	42		normal	0.836	normal
B64	2 years	M	14	90.4	1.09	normal	0.78	normal	0.88	normal	High	NO	99	43.8	14.8	normal	273000	normal	13.8		normal	1.02	normal	35.3		normal	1	normal
B65	19 months	F	8.8	70	0.31	normal	-0.59	normal	0.86	normal	High	NO	98	39.7	13.2	normal	294000	normal	13.5		normal	1	normal	42.5		normal	0.834	normal
B66	8 years	F	25	134	-0.17	normal	1.04	normal	-1.19	normal	High	NO	98	34.5	10.8	normal	328000	normal	13.7		normal	1.01	normal	37.1		normal	1.012	normal
B67	5 years	M	18	120	-0.21	normal	2.12	tall	-2.57	moderately wasted	High	NO	99	37.4	13	normal	304000	normal	9.2		normal	0.68	normal	36.4		normal	0.985	normal
B68	17 years	F	50	159.5			-0.53	normal	-0.56	normal	Middle	NO	98	36.6	12.6	normal	330000	normal	10.1		normal	0.75	normal	42.6		normal	0.603	normal
B69	14 years	F	50	161			-0.01	normal	-0.26	normal	Middle	NO	99	32.9	10.4	normal	255000	normal	13.9		normal	1.03	normal	35.5		normal	0.915	normal
B70	9 years	F	29	130.9	-0.27	normal	-0.84	normal	0.26	normal	High	NO	98	36.7	12.2	normal	300000	normal	13.5		normal	1	normal	29.7		normal	0.798	normal
